# Supplementary material
Source: PubMed Central journal article supplement (PMC2887070)
Supplement: mcq050_1.pdf [file mcq050_1.pdf]

## SUPPLEMENTARY DATA

TABLE S1. Orthologous genes associated with mineral QTLs detected in the B104-2 × Eyou Changjia RIL population by *in silico* mapping between *Arabidopsis thaliana* and *Brassica napus*. Genes are categorized by predicted function.

| QTLs involved                                     | Mineral trait     | Gene*        | Locus ID  | Description on TAIR<br>( <a href="http://www.arabidopsis.org/">http://www.arabidopsis.org/</a> ) |
|---------------------------------------------------|-------------------|--------------|-----------|--------------------------------------------------------------------------------------------------|
| <i>CaNP-A5, MgNP-A5, PNP-A5</i>                   | Ca, Mg, P         | <i>PAP16</i> | AT3G10150 | acid phosphatase/protein serine/threonine phosphatase                                            |
| <i>CaNP-A5, MgNP-A5, PNP-A5</i>                   | Ca, Mg, P         | <i>PAP17</i> | AT3G17790 | acid phosphatase/protein serine/threonine phosphatase                                            |
| <i>CaLP-C2a, PLP-C2</i>                           | Ca, P             | <i>PAP28</i> | AT5G57140 | acid phosphatase/protein serine/threonine phosphatase                                            |
| <i>CaLP-A4, MnLP-A4</i>                           | Ca, Mn            | <i>CAX1</i>  | At2g38170 | calcium:hydrogen antiporter; encodes a high-affinity vacuolar calcium antiporter                 |
| <i>FeNP-A5, CaNP-A5, MgNP-A5, PNP-A5</i>          | Fe, Ca, Mg, P     | <i>CAX2</i>  | At3g13320 | Low-affinity calcium antiporter                                                                  |
| <i>MnLP-A3, FeNP-A5, CaNP-A5, MgNP-A5, PNP-A5</i> | Mn, Fe, Ca, Mg, P | <i>CAX9</i>  | At3g14070 | involved in cation (K, Na, and Mn) homeostasis and transport                                     |
| <i>MnNP-A1</i>                                    | Mn                | <i>YSL1</i>  | At4g24120 | oligopeptide transporter; member of a small family of oligopeptide transporters                  |
| <i>MnLP-A3, FeNP-A5, CaNP-A5, MgNP-A5, PNP-A5</i> | Mn, Fe, Ca, Mg, P | <i>YSL5</i>  | At3g17650 | oligopeptide transporter; <i>Arabidopsis thaliana</i> metal-nicotianamine transporter            |
| <i>MgNP-C6a</i>                                   | Mg                | <i>YSL7</i>  | At1g65730 | oligopeptide transporter; <i>Arabidopsis thaliana</i> metal-nicotianamine transporter            |
| <i>FeNP-A5, CaNP-A5, MgNP-A5, PNP-A5</i>          | Fe, Ca, Mg, P     | <i>ZIP1</i>  | At3g12750 | member of Zrt- and Irt-related protein (ZIP) family; transcript is induced in response to        |

|                                                   |                   |               |           |                                                                                                                                             |
|---------------------------------------------------|-------------------|---------------|-----------|---------------------------------------------------------------------------------------------------------------------------------------------|
| <i>MnLP-A3, FeNP-A5, CaNP-A5, MgNP-A5, PNP-A5</i> | Mn, Fe, Ca, Mg, P | <i>MT3</i>    | At3g15353 | zinc deficiency in the root<br>metallothionein; binds to and detoxifies excess copper and other metals                                      |
| <i>CaLP-A3, CaNP-A5, MgNP-A5, PNP-A5</i>          | Ca, Mg, P         | <i>MT2A</i>   | AT3G09390 | metallothionein; binds to and detoxifies excess copper and other metals                                                                     |
| <i>MnNP-A1</i>                                    | Mn                | <i>NRAMP5</i> | At4g18790 | metal ion transporter; member of Nramp2 family                                                                                              |
| <i>MnNP-A1</i>                                    | Mn                | <i>IRT1</i>   | At4g19690 | Fe(II) transport protein                                                                                                                    |
| <i>MgLP-A1b, PLP-A1</i>                           | Mg, P             | <i>UGP</i>    | AT3G03250 | thought to encode a cytosolic UDP-glucose pyrophosphorylase with a strong similarity to potato UTP--glucose-1-phosphate uridylyltransferase |
| <i>MnLP-A3</i>                                    | Mn                | <i>AZF2</i>   | AT3G19580 | encodes a zinc finger protein; mRNA levels are upregulated in response to ABA, high salt, and mild desiccation                              |
| <i>CaNP-A5, MgNP-A5, PNP-A5</i>                   | Ca, Mg, P         | <i>MRS2-3</i> | At3g19640 | magnesium transporter CorA-like family protein (MRS2-3)                                                                                     |
| <i>PLP-C3a</i>                                    | P                 | <i>PHT3;1</i> | AT5G14040 | mitochondrial phosphate transporter                                                                                                         |
| <i>PLP-C3a</i>                                    | P                 | <i>PHT4;5</i> | AT5G20380 | encodes an inorganic phosphate transporter                                                                                                  |
| <i>CaLP-C2a, PLP-C2</i>                           | Ca, P             | <i>GPT1</i>   | AT5g54800 | encodes glucose6-Phosphate/phosphate transporter 1; essential for pollen maturation and embryo sac development                              |
| <i>CaNP-A5, MgNP-A5, PNP-A5</i>                   | Ca, Mg, P         | <i>IPS1</i>   | AT3G09922 | cellular response to phosphate starvation                                                                                                   |

\* PAP, purple acid phosphatase; CAX, cation exchanger; YSL, yellow stripe-like; MT, metallothionein; ZIP, zinc regulated transporter, iron regulated transporter-like protein;

NRAMP, natural resistance-associated macrophage protein; IRT, ion-regulated transporter; UGP, UDP-glucose pyrophosphorylase; AZF, Arabidopsis zinc-finger protein; MRS, mitochondrial RNA splicing; PHT, phosphate transporter; GPT, glucose6-phosphate/phosphate transporter; IPS, induced by phosphate starvation.
